# Supplementary material for: Effects of Obesity on Medial Tibiofemoral Cartilage Mechanics in Females—An Exploration Using Musculoskeletal Simulation and Probabilistic Cartilage Failure Modelling
Source: MDPI journal article supplement (doi:10.3390/life13020270), 2023-01-18

## **Supplementary Material (S1)**

### **Reliability and MDC values**

Table S1: Reliability and MDC values.

|                                       | <b>ICC</b> | <b>MDC</b> |
|---------------------------------------|------------|------------|
| Peak medial tibiofemoral force (BW)   | 0.951      | 0.27       |
| Peak medial tibiofemoral stress (MPa) | 0.947      | 0.01       |
| Peak medial tibiofemoral strain       | 0.945      | 0.16       |

Note:  $MDC = 1.96 \times SEM \times \text{square root of } 2$ .

## **Supplementary Material (S2)**

### **Sensitivity analysis**

Table S2: Walking velocity

|                        | <b>Mean</b> | <b>SD</b> |
|------------------------|-------------|-----------|
| Walking Velocity (m/s) | 1.62        | 0.21      |

Table S3: Input peak medial tibiofemoral forces

|                                             | <b>Mean</b> | <b>SD</b> |
|---------------------------------------------|-------------|-----------|
| Peak medial tibiofemoral force walking (BW) | 3.25        | 0.55      |

Linear line of best fit included to highlight the nature of the data distribution.

**Figure S1: Anterior femoral arc in sagittal plane**

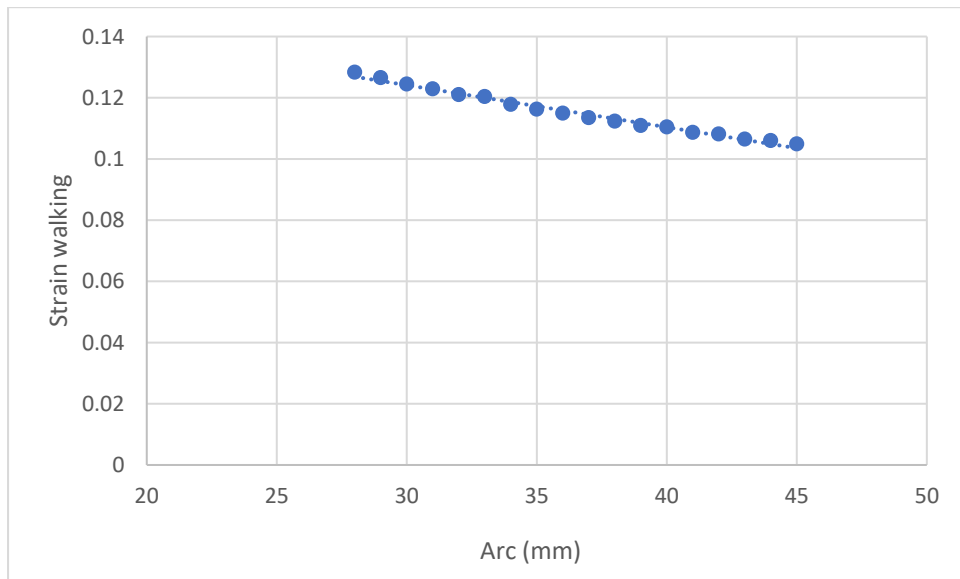

**Figure S2: Femoral cartilage modulus**

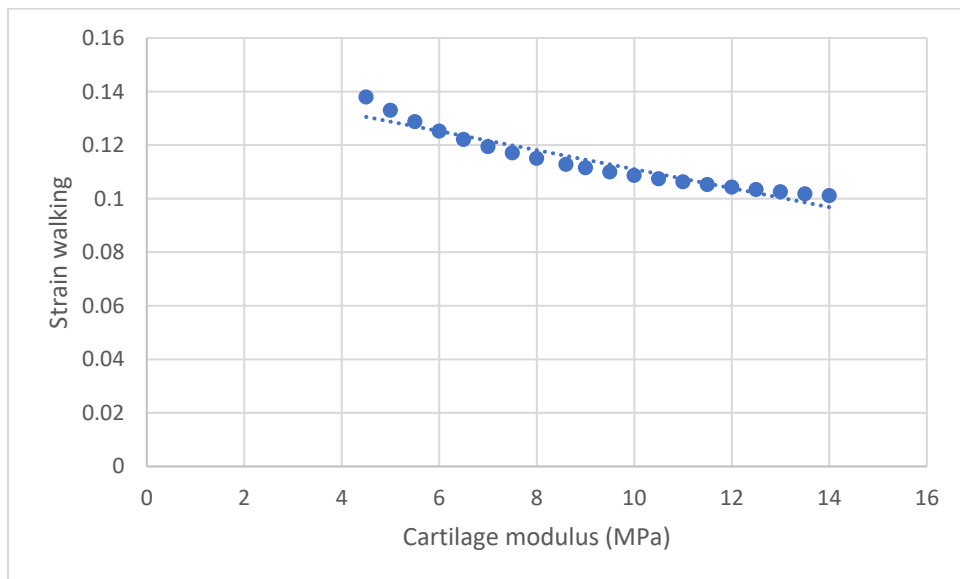

**Figure S3: Covered tibial cartilage modulus**

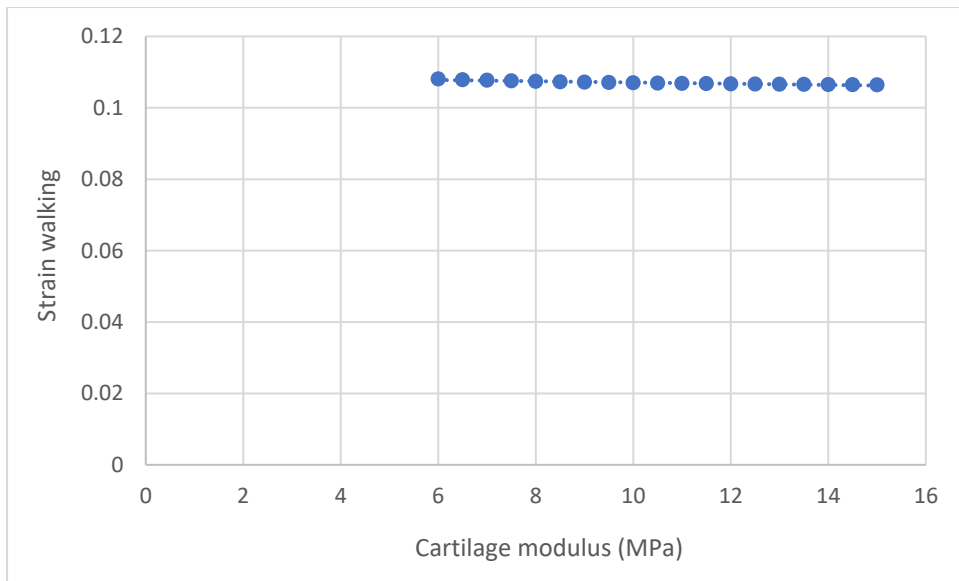

**Figure S4: Uncovered tibial cartilage modulus**

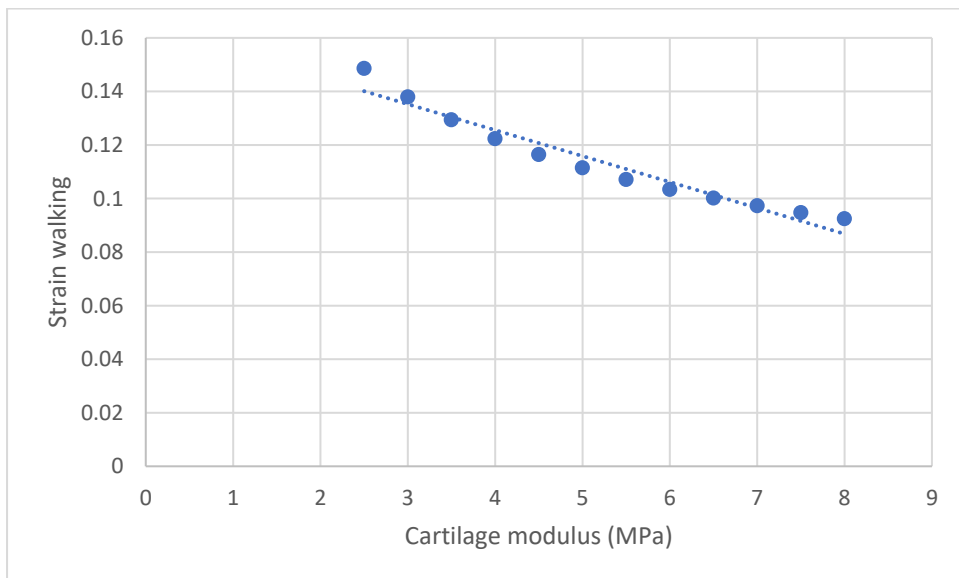

**Figure S5: Meniscus modulus**

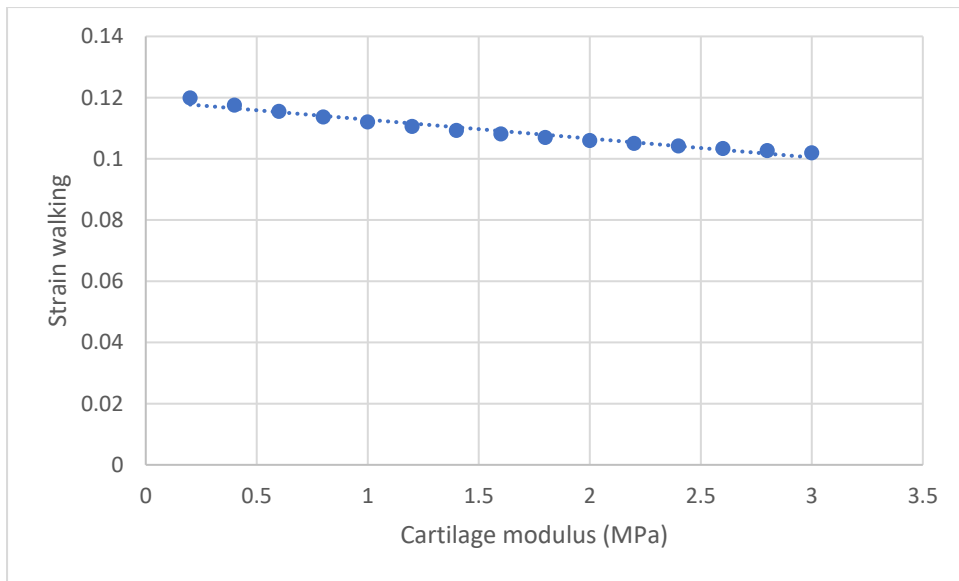

**Figure S6: Unloaded cartilage height**

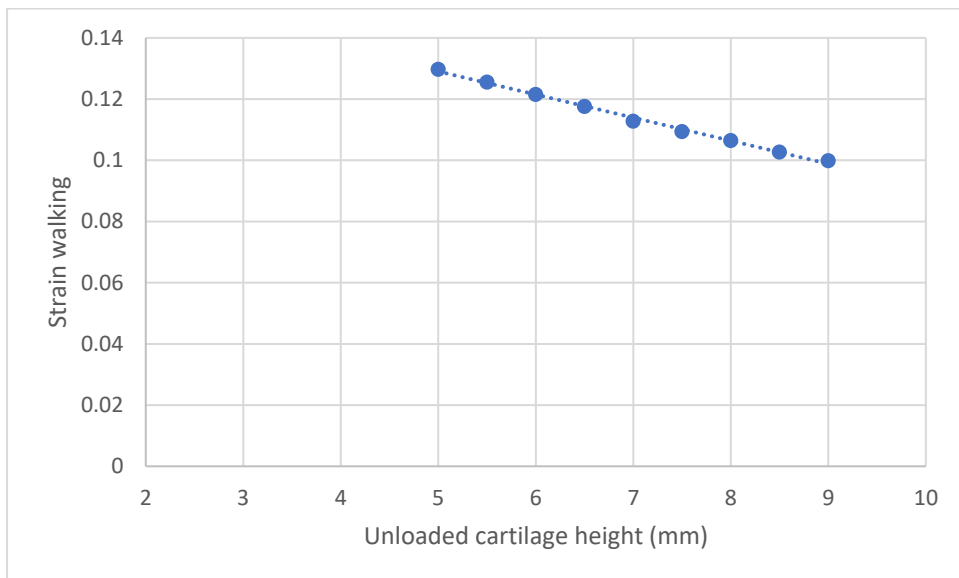

**Figure S7: Frontal tibial arc**

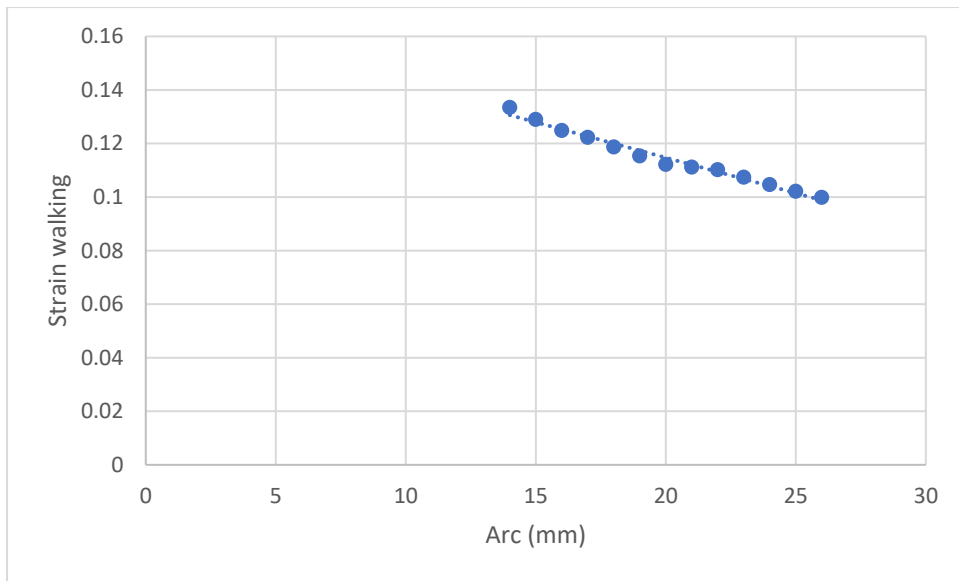

**Figure S8: Poisson's ratio**

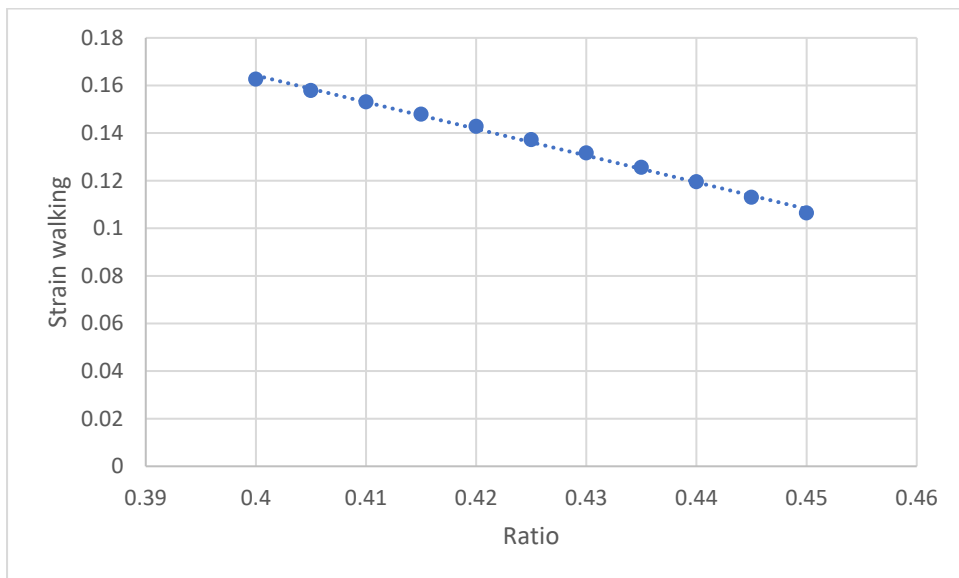

Supplement: s1 [file s1]
